# Supplementary material for: Advanced photocatalytic performance of PVP-modified BiOBr materials for the removal of 2,4-DCP and mechanism insight
Source: Royal Society of Chemistry journal article supplement (doi:10.1039/d2cy01406h), 2022-01-01
Supplement: d2cy01406h1.pdf [file d2cy01406h1.pdf]

## Supporting Information

Advanced photocatalytic performance of PVP-modified BiOBr materials  
for the removal of 2, 4-DCP and mechanism insight

Lianghai Xia, Lingdong Kong\*, Jie Tan, Yuwen Wang, Shengyan Jin, Chao Wang

Department of Environmental Science & Engineering, Jiangwan Campus, Fudan  
University, No. 2205 Songhu Road, Shanghai, 200438, China.

\*Corresponding author. Email: [ldkong@fudan.edu.cn](mailto:ldkong@fudan.edu.cn)

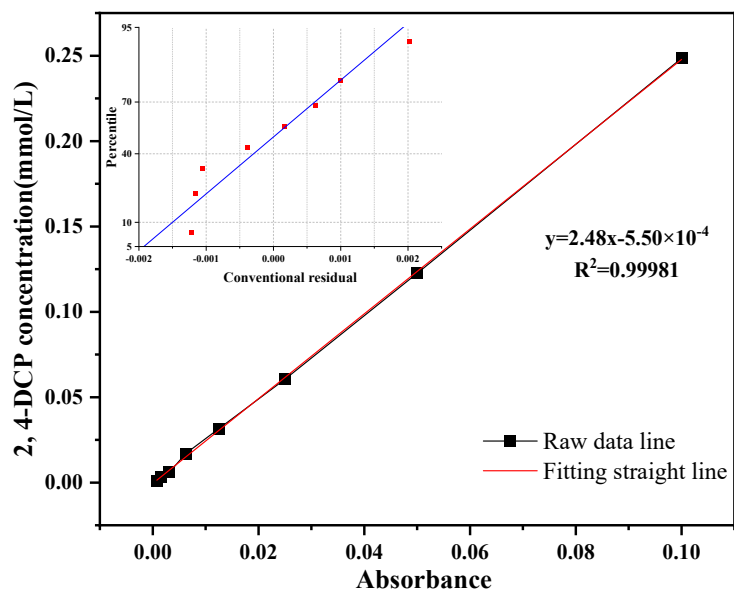

**Fig. S1** The linear relationship between the concentration of 2, 4-DCP solution and its absorbance measured by UV/Vis spectrophotometer at 285 nm.

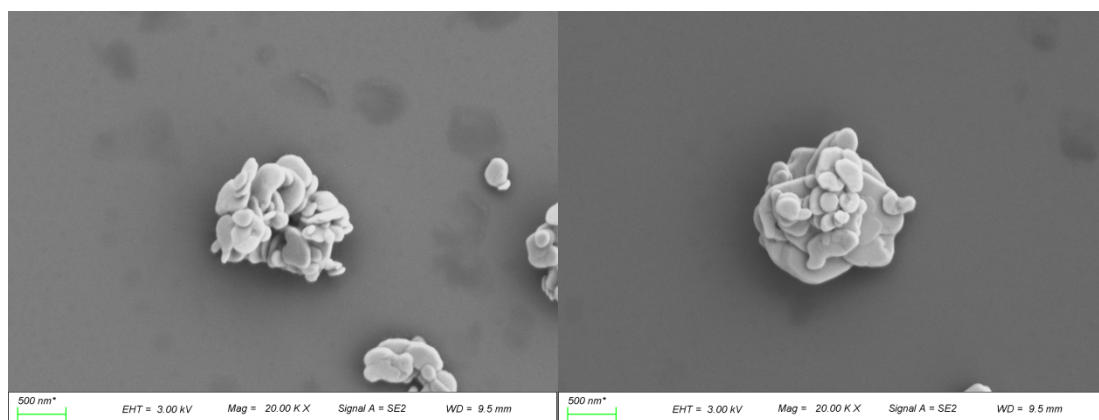

**Fig. S2** The morphology of pure bismuth oxybromide.

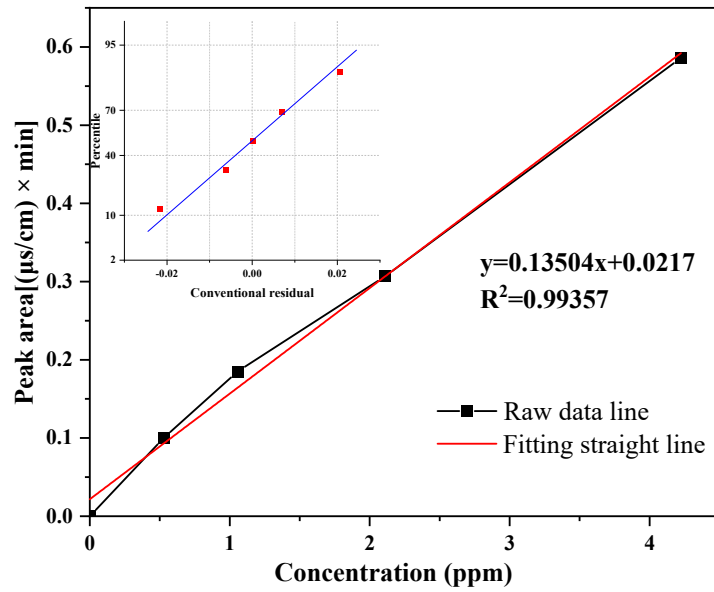

Fig. S3 The standard curve of formic acid measured by ion chromatography.

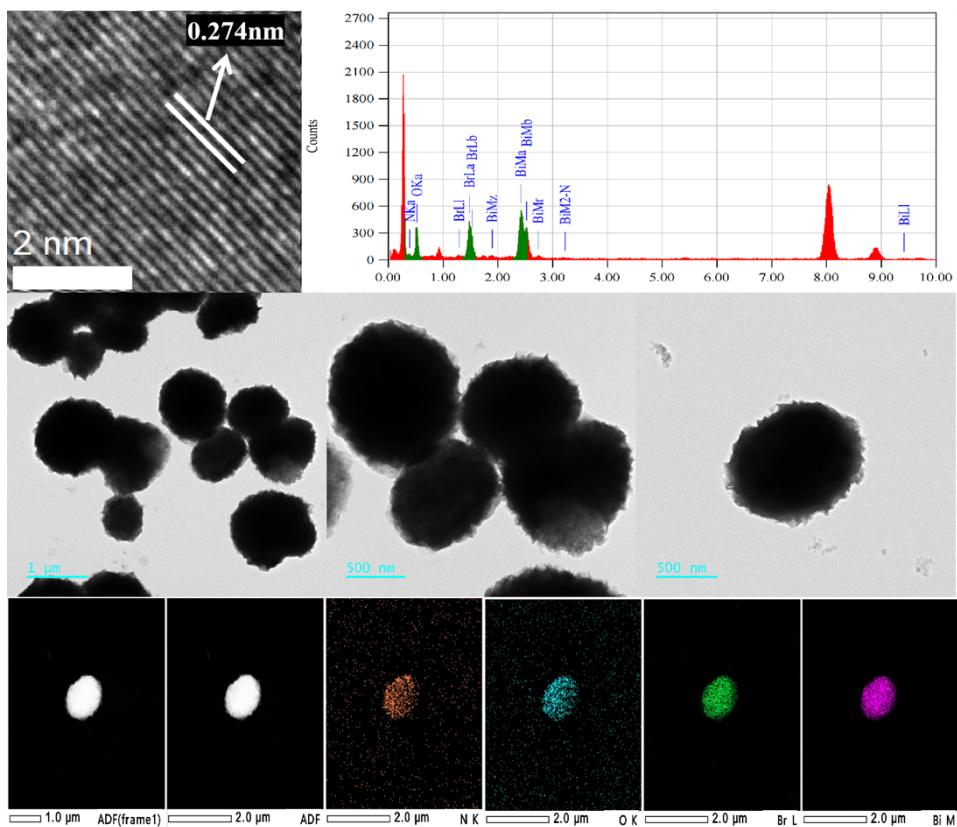

Fig. S4 The TEM images of BP-1.0 sample after reaction.

**Table S1** BET data of BiOBr and BP samples

| Sample | $S_{\text{BET}}$ ( $\text{m}^2\text{g}^{-1}$ ) | Pore Size (nm) | Pore Volume ( $\text{cm}^3\text{g}^{-1}$ ) |
|--------|------------------------------------------------|----------------|--------------------------------------------|
| BiOBr  | 5.076                                          | 16.668         | 0.002                                      |
| BP-0.1 | 4.836                                          | 31.456         | 0.038                                      |
| BP-0.5 | 4.440                                          | 20.027         | 0.022                                      |
| BP-1.0 | 2.358                                          | 19.233         | 0.011                                      |
| BP-1.5 | 2.151                                          | 16.789         | 0.001                                      |
